# Supplementary material
Source: ML conference proceedings conference paper supplement (https://proceedings.mlr.press/v89/szabo19a.html)
Supplement: Supplementary file 1 [file szabo19a-supp.pdf]

## Supplement

In Section A we prove our remark on the validity of the Bernstein condition for higher-order derivatives in the case of kernels with faster spectral decay. The result extends the example of Gaussian kernels detailed in the main part of the paper.

### A BERNSTEIN CONDITION FOR HIGHER-ORDER DERIVATIVES

We prove that in the case of kernels with spectral density decaying as  $f_\Lambda(\omega) \propto e^{-\omega^{2\ell}}$  ( $\ell \in \mathbb{N}^+$ ), the Bernstein condition (15) holds for  $r \leq 2\ell$ -order derivatives. This example extends the case of Gaussian kernels where  $\ell = 1$  and  $r \leq 2$ . Let  $\ell \in \mathbb{N}^+$  and the spectral measure associated with kernel  $k$  be absolutely continuous w.r.t. the Lebesgue measure with density

$$f_\Lambda(\omega) = c_\ell e^{-\omega^{2\ell}}$$

for some  $c_\ell > 0$ .  $f_\Lambda$  is positive and we determine  $c_\ell$  as:

$$\begin{aligned} 1 &= \int_{\mathbb{R}} f_\Lambda(\omega) d\omega = \int_{\mathbb{R}} c_\ell e^{-\omega^{2\ell}} d\omega = 2c_\ell \int_0^\infty e^{-\omega^{2\ell}} d\omega \\ &= \frac{c_\ell}{\ell} \int_0^\infty e^{-y} y^{\frac{1}{2\ell}-1} dy = \frac{c_\ell}{\ell} \Gamma\left(\frac{1}{2\ell}\right) \Rightarrow \\ c_\ell &= \frac{\ell}{\Gamma\left(\frac{1}{2\ell}\right)} \end{aligned}$$

where we used  $y = \omega^{2\ell}$ ,  $\omega = y^{\frac{1}{2\ell}}$ ,  $d\omega = \frac{1}{2\ell} y^{\frac{1}{2\ell}-1} dy$  and the pdf of the Gamma distribution ( $b = 1$ ,  $a = \frac{1}{2\ell}$ )  $g(y; a, b) = \frac{b^a}{\Gamma(a)} y^{a-1} e^{-by}$ , ( $y > 0$ ,  $a > 0$ ,  $b > 0$ ) from which it follows that

$$\int_0^\infty y^{a-1} e^{-by} dy = \frac{\Gamma(a)}{b^a}. \quad (24)$$

Consequently, one obtains

$$A_{r,n} = A_{r,n}(\Lambda) = \frac{\int_{\mathbb{R}} |\omega|^{rn} d\Lambda(\omega)}{\left[ \int_{\mathbb{R}} |\omega|^{2r} d\Lambda(\omega) \right]^{\frac{n}{2}}} = \frac{\frac{\Gamma\left(\frac{rn+1}{2\ell}\right)}{\Gamma\left(\frac{1}{2\ell}\right)}}{\left[ \frac{\Gamma\left(\frac{2r+1}{2\ell}\right)}{\Gamma\left(\frac{1}{2\ell}\right)} \right]^{\frac{n}{2}}}$$

by using (24) with  $b = 1$ ,  $a = \frac{r+1}{2\ell}$  and the value of  $c_\ell$ :

$$\begin{aligned} \int_{\mathbb{R}} |\omega|^r d\Lambda(\omega) &= \int_{\mathbb{R}} |\omega|^r c_\ell e^{-\omega^{2\ell}} d\omega \\ &= 2c_\ell \int_0^\infty \omega^r e^{-\omega^{2\ell}} d\omega = \frac{c_\ell}{\ell} \int_0^\infty e^{-y} y^{\frac{r}{2\ell}} y^{\frac{1}{2\ell}-1} dy \\ &= \frac{c_\ell}{\ell} \Gamma\left(\frac{r+1}{2\ell}\right) = \frac{\Gamma\left(\frac{r+1}{2\ell}\right)}{\Gamma\left(\frac{1}{2\ell}\right)}. \end{aligned}$$

Next we assume that  $r \leq 2\ell$  is fixed and apply induction to prove (15).

- For  $n = 2$ , by definition  $A_{r,2} = 1$  ( $\forall r \in \mathbb{N}^+$ ).
- The induction argument is as follows. By the inductive assumption it is sufficient to show the existence of  $K_r \geq 1$  such that

$$B_{r,n} := \frac{A_{r,n+1}}{A_{r,n}} \leq (n+1)K_r \quad (25)$$

since  $A_{r,n} \leq \frac{n!}{2} K_r^{n-2}$  and  $\frac{A_{r,n+1}}{A_{r,n}} \leq (n+1)K_r$  imply  $A_{r,n+1} \leq \frac{(n+1)!}{2} K_r^{n+1-2}$ . By defining  $c_r := \frac{\Gamma\left(\frac{2r+1}{2\ell}\right)}{\Gamma\left(\frac{1}{2\ell}\right)}$ , we obtain

$$\begin{aligned} B_{r,n} &= \frac{\Gamma\left(\frac{r(n+1)+1}{2\ell}\right) \Gamma\left(\frac{1}{2\ell}\right) (c_r)^{\frac{n}{2}}}{\Gamma\left(\frac{1}{2\ell}\right) (c_r)^{\frac{n+1}{2}} \Gamma\left(\frac{rn+1}{2\ell}\right)} = \frac{\Gamma\left(\frac{r(n+1)+1}{2\ell}\right)}{\sqrt{c_r} \Gamma\left(\frac{rn+1}{2\ell}\right)} \\ &= \frac{\Gamma\left(\frac{rn+1}{2\ell} + \frac{r}{2\ell}\right)}{\sqrt{c_r} \Gamma\left(\frac{rn+1}{2\ell}\right)} \stackrel{(a)}{\leq} D_{r,n} \frac{\Gamma\left(\frac{rn+1}{2\ell} + \frac{2\ell}{2\ell}\right)}{\sqrt{c_r} \Gamma\left(\frac{rn+1}{2\ell}\right)} \\ &\stackrel{(b)}{=} D_{r,n} \frac{1}{\sqrt{c_r}} \frac{rn+1}{2\ell} \stackrel{(c)}{\leq} D_{r,n} \frac{1}{\sqrt{c_r}} \underbrace{\frac{2\ell n+1}{2\ell}}_{n+\frac{1}{2\ell}} \\ &< D_{r,n} \frac{n+1}{\sqrt{c_r}}. \end{aligned}$$

Indeed,

- (a): The Gamma function has a global minima on the positive real line at  $z_{min} \approx 1.46163$ , it is strictly monotonically decreasing on  $(0, z_{min})$  and strictly monotonically increasing on  $(z_{min}, \infty)$ . The latter implies

$$\Gamma(z_1) \leq \Gamma(z_2) \text{ for } z_{min} \leq z_1 \leq z_2. \quad (26)$$

Let us choose  $z_1 = \frac{rn+1}{2\ell} + \frac{r}{2\ell}$  and  $z_2 = \frac{rn+1}{2\ell} + \frac{2\ell}{2\ell}$ .  $z_1 \leq z_2$  since  $r \leq 2\ell$ . With this choice (26) guarantees (a) with  $D_{r,n} = 1$  if

$$\begin{aligned} z_{min} &\leq \frac{n+2}{2\ell} = \frac{rn+1}{2\ell} + \frac{r}{2\ell} \Big|_{r=1} \leq \\ &\leq \frac{rn+1}{2\ell} + \frac{r}{2\ell} = z_1. \end{aligned}$$

If  $n_s := \lceil 2\ell z_{min} - 2 \rceil \leq n$ , then (d) holds. This means that (a) holds with

$$D_{r,n} = 1 \quad \text{if } n_s \leq n.$$

For the remaining  $n = 2, \dots, n_s - 1$  values, (a) is fulfilled with equality using  $D_{r,n} := \frac{\Gamma\left(\frac{rn+1}{2\ell} + \frac{2\ell}{2\ell}\right)}{\Gamma\left(\frac{rn+1}{2\ell} + \frac{r}{2\ell}\right)}$ .

- (b): We applied the  $\Gamma(z+1) = z\Gamma(z)$  property.
- (c): It follows from  $r \leq 2\ell$ .

To sum up, we got that

$$\begin{aligned} B_{r,n} &\leq \frac{D_{r,n}}{\sqrt{c_r}} (n+1), \text{ with} \\ D_{r,n} &= \begin{cases} 1 & \text{if } n_s \leq n \\ \frac{\Gamma\left(\frac{rn+1}{2\ell} + \frac{2\ell}{2\ell}\right)}{\Gamma\left(\frac{rn+1}{2\ell} + \frac{r}{2\ell}\right)} & n = 2, \dots, n_s - 1 \end{cases} \end{aligned}$$

Thus, one can choose

$$K_r = \max \left( \frac{D_{r,2}}{\sqrt{c_r}}, \dots, \frac{D_{r,n_s-1}}{\sqrt{c_r}}, \frac{1}{\sqrt{c_r}}, 1 \right)$$

in (25).
